# Supplementary material for: Artificial Intelligence as a Tool to Study the 3D Skeletal Architecture in Newly Settled Coral Recruits: Insights into the Effects of Ocean Acidification on Coral Biomineralization
Source: MDPI journal article supplement (doi:10.3390/jmse10030391), 2022-03-09
Supplement: s1 [file s1]

# **Artificial intelligence as a tool to study the 3D internal skeletal architecture in newly settled coral recruits: insights into the effect of Ocean Acidification on coral biomineralization**

Federica Scucchia<sup>1,2</sup>, Katrein Sauer<sup>3</sup>, Paul Zaslansky<sup>3</sup> and Tali Mass<sup>1,4</sup>

<sup>1</sup>Department of Marine Biology, Leon H. Charney School of Marine Sciences, University of Haifa, Israel

<sup>2</sup>The Interuniversity Institute of Marine Sciences, Eilat, Israel

<sup>3</sup>Department for Operative and Preventive Dentistry, Charité - Universitätsmedizin Berlin, Germany

<sup>4</sup>The Morris Kahn Marine Research Station, Sdot Yam, Israel

## **Supplemental Figures**

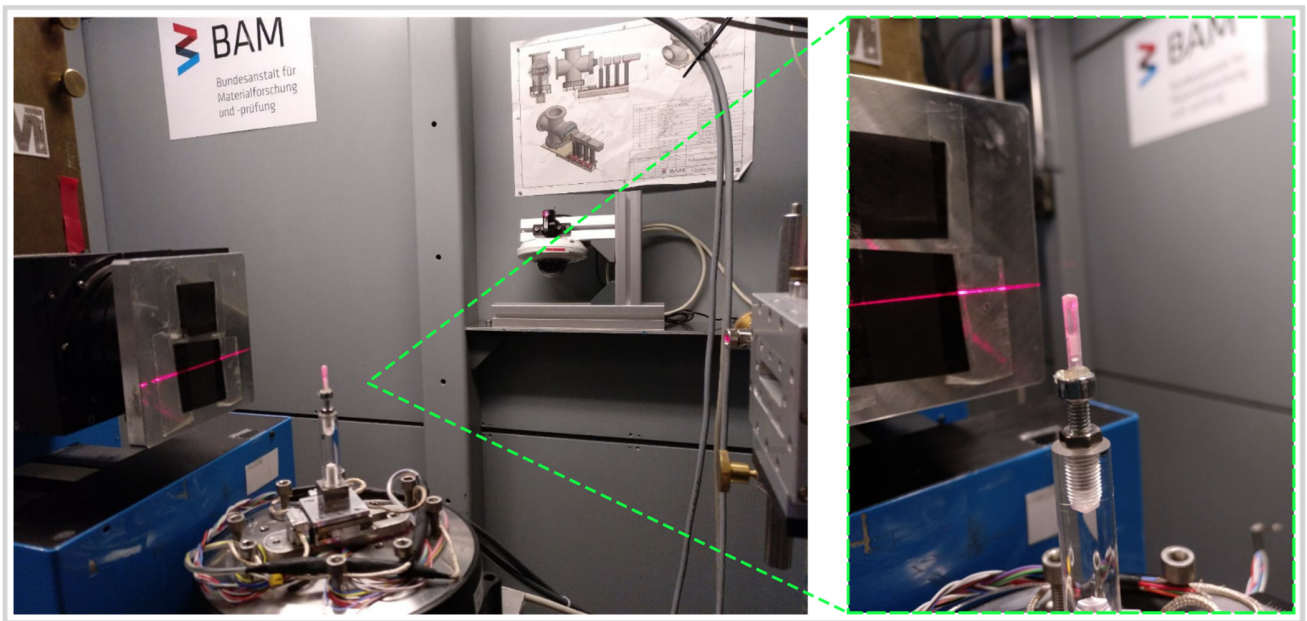

**Figure S1.** Coral sample fixed in the sample holder in front of the x-ray source. Each primary polyp was attached to a metal stub and scanned with repeated rotation on a high-resolution X-ray  $\mu$ CT imaging sample stage at BAMline, the imaging beamline at BESSY (HZB - Helmholtz-Zentrum Berlin, Germany).

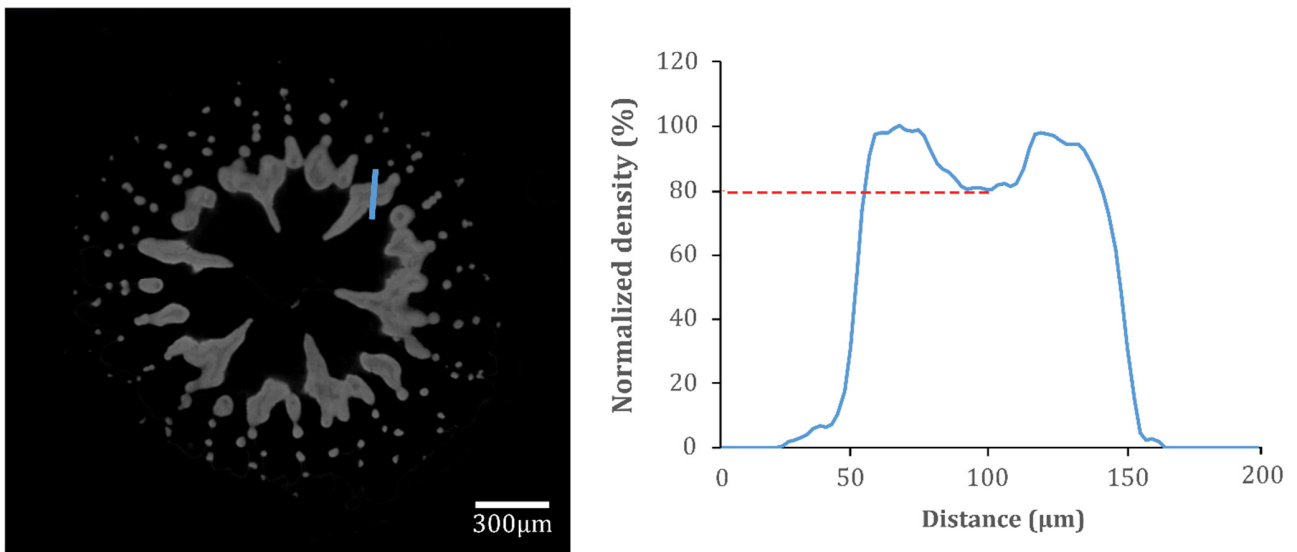

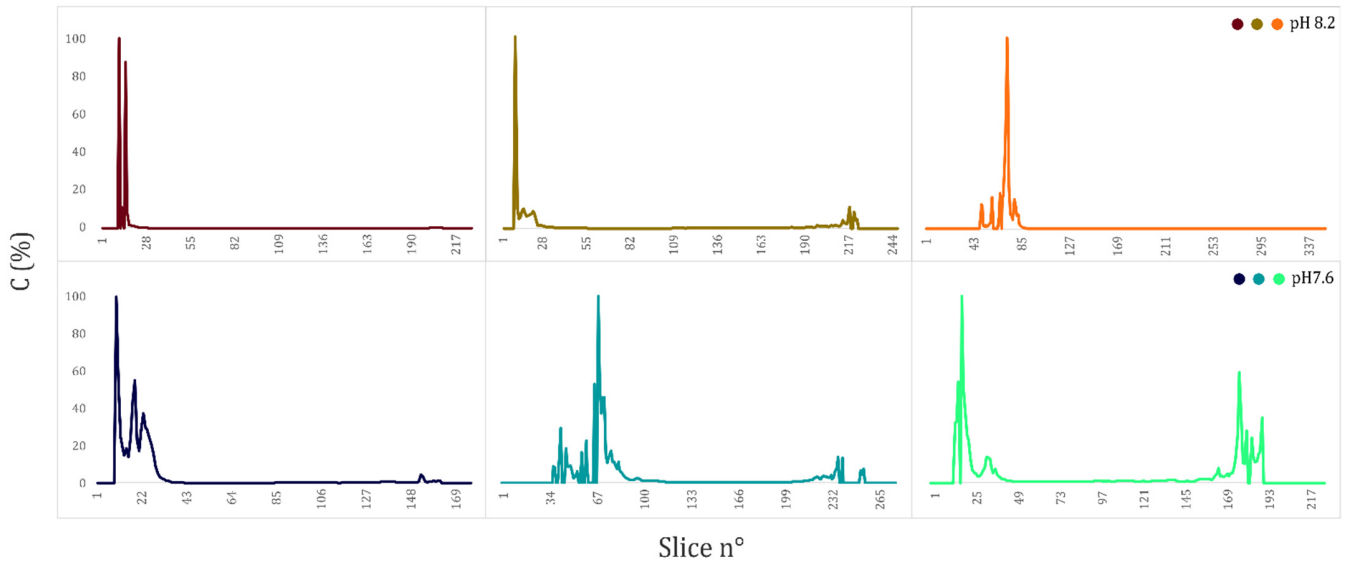

**Figure S3.** Skewness of the distributions of the per-slice RADs-TDs shape configuration across tomographic datasets. The ratio of the RADs perimeter/area over the TDs perimeter/area (" $C$ ") was computed as an estimate of the relative shape of the skeletal features across the recruit's skeletons, going from the base (i.e., slice 1) to the top. The skewness values (see Figure 8 in the main text) are used as a metric to evaluate the differences among distributions, i.e., the degree of the RADs-TDs shape variation.

**Table S1.** Parameters of the carbonate chemistry across experimental pH conditions. Carbonate seawater chemistry parameters were calculated from measured values of temperature (T), salinity (S), pH (NBS) and total alkalinity (TA). Measurements of pH, temperature and salinity were conducted three times a day, and measurements of total alkalinity were carried out once a day in triplicates for each experimental tank. Values are shown as means  $\pm$  SD. DIC, dissolved inorganic carbon;  $\Omega_{ar}$ , aragonite saturation state.

| Treatment | Tank | T (C°)     | S (‰)     | pH         | CO <sub>2</sub> (μmol/kg-SW) | pCO <sub>2</sub> (μatm) | HCO <sub>3</sub> <sup>-</sup> (μmol/kg-SW) | CO <sub>3</sub> <sup>2-</sup> (μmol/kg-SW) | DIC (μmol/kg-SW) | TA (μmol/kg-SW) | $\Omega_{ar}$ |
|-----------|------|------------|-----------|------------|------------------------------|-------------------------|--------------------------------------------|--------------------------------------------|------------------|-----------------|---------------|
| pH 8.2    | 1    | 22.08      | 39.9      | 8.16       | 14.5                         | 486.5                   | 2173.4                                     | 256.7                                      | 2444.6           | 2793.0          | 3.9           |
|           |      | $\pm 0.20$ | $\pm 0.4$ | $\pm 0.04$ | $\pm 1.4$                    | $\pm 47.4$              | $\pm 41.6$                                 | $\pm 16.7$                                 | $\pm 26.9$       | $\pm 8.4$       | $\pm 0.2$     |
|           | 2    | 22.10      | 40.0      | 8.12       | 14.3                         | 480.3                   | 2134.7                                     | 251.3                                      | 2400.2           | 2743.2          | 3.8           |
|           |      | $\pm 0.20$ | $\pm 0.4$ | $\pm 0.03$ | $\pm 1.3$                    | $\pm 43.1$              | $\pm 36.4$                                 | $\pm 15.2$                                 | $\pm 23.2$       | $\pm 8.3$       | $\pm 0.2$     |
|           | 3    | 22.23      | 40.2      | 8.14       | 14.7                         | 495.4                   | 2115.9                                     | 240.8                                      | 2371.4           | 2700.9          | 3.6           |
|           |      | $\pm 0.14$ | $\pm 0.5$ | $\pm 0.03$ | $\pm 1.1$                    | $\pm 35.6$              | $\pm 27.2$                                 | $\pm 11.0$                                 | $\pm 19.5$       | $\pm 13.6$      | $\pm 0.2$     |
| pH 7.6    | 4    | 22.00      | 39.9      | 7.61       | 56.9                         | 1997.7                  | 2513.1                                     | 83.6                                       | 2656.2           | 2715.1          | 1.3           |
|           |      | $\pm 0.31$ | $\pm 0.4$ | $\pm 0.05$ | $\pm 7.2$                    | $\pm 234.8$             | $\pm 20.3$                                 | $\pm 8.1$                                  | $\pm 19.8$       | $\pm 8.8$       | $\pm 0.1$     |
|           | 5    | 22.28      | 39.9      | 7.63       | 56.2                         | 1901.4                  | 2477.4                                     | 87.2                                       | 2620.8           | 2688.6          | 1.3           |
|           |      | $\pm 0.08$ | $\pm 0.3$ | $\pm 0.06$ | 9.0                          | $\pm 300.8$             | $\pm 29.9$                                 | $\pm 11.3$                                 | $\pm 27.6$       | $\pm 7.7$       | $\pm 0.2$     |
|           | 6    | 22.25      | 40.1      | 7.62       | 56.6                         | 1913.7                  | 2471.7                                     | 85.5                                       | 2613.8           | 2678.9          | 1.3           |
|           |      | $\pm 0.08$ | $\pm 0.4$ | $\pm 0.04$ | 5.4                          | $\pm 179.2$             | $\pm 18.2$                                 | $\pm 6.9$                                  | $\pm 16.8$       | $\pm 6.0$       | $\pm 0.1$     |
